# Supplementary material for: Colorimetric and optical Hg(ii) ion sensor developed with conjugates of M13-bacteriophage and silver nanoparticles
Source: Royal Society of Chemistry journal article supplement (doi:10.1039/c8nj04496a), 2018-01-01
Supplement: c8nj04496a1.pdf [file c8nj04496a1.pdf]

## Supplementary Information

### **Colorimetric and Optical Hg(II) Ions Sensor Developed with Conjugates of M13-Bacteriophage and Silver Nanoparticles**

Shanmugam Manivannan<sup>1</sup>, Yeji Seo<sup>1</sup>, Dong-Ku Kang<sup>2</sup> and Kyuwon Kim\*,<sup>1</sup>

<sup>1</sup> Electrochemistry Laboratory for Sensors & Energy (ELSE),

<sup>2</sup> Nanobio Laboratory, Department of Chemistry,  
Incheon National University, Incheon 22012, Republic of Korea.

\*E-mail: kyuwon\_kim@inu.ac.kr

#### **M13-bacteriophage growth, purification and amplification process:**

M13<sub>wild</sub> was grown and purified following standard biochemical protocols described in literature.<sup>1-4</sup> Briefly, one colony of E. coli XL-1 blue was grown in 3 ml of LB media to mid-log phase (E. coli XL-1 blue culture) and infected with 10  $\mu$ L of M13<sub>wild</sub>. The culture was incubated at 37°C with shaking for 12 h, and then centrifuged to remove E. coli. The M13<sub>wild</sub> was collected by PEG/NaCl (20% PEG and 2.5 mol/L NaCl) precipitation and reconstituted in Tris-buffered saline (10 mM). The typical yield was ~ 20 mg of M13<sub>wild</sub> per liter. The final concentration was determined spectrophotometrically using an extinction coefficient of 3.84 cm<sup>2</sup>/mg at 269 nm.<sup>3,5</sup>

Attachment of cation binding peptides at the major coat protein (Gene VIII) of M13 is reported previously.<sup>6</sup> Briefly, two primers were designed to insert 4E into the gene VIII protein: 5'-ATATATCTGCAGNKGAAAGAGGAAGAGCCCGCAAAGCGGCCTTTAACTCCC-3' (4E), and 5'-GGAAGCTGCAGCGAAAGACAGCATCGGAACGAGG-3' (linearization primer). To collect M13<sub>4E</sub> phages, the inverse polymerase chain reaction (PCR) cloning method was performed using the above mentioned primers (the linearization primer with M13<sub>4E</sub> primer). The PCR product was purified then the amplified plasmid, and phage plaques were verified by DNA sequencing. Furthermore, we have amplified the M13<sub>4E</sub> phage for our experiments, and the methods were same to the M13<sub>wild</sub> as mentioned above.<sup>3,5</sup>

#### **References:**

1. S. Manivannan, I. Kang, Y. Seo, H. E. Jin, S. W. Lee and K. Kim, *ACS Appl. Mater. Interfaces*, 2017, **9**, 32965-32976.
2. N. Korkmaz, *Colloids Surf., B*, 2013, **112**, 219-228.
3. G.P. Smith and V.A. Petrenko, Phage display, *Chem. Rev.*, 1997, **972**, 391-410.

4. Y. Seo, S. Manivannan, I. Kang, S. W. Lee and K. Kim, *Biosens. Bioelectron.*, 2017, **94**, 87-93.

5. J. Sambrook and D.W. Russell, Cold Spring Harbor Laboratory Press 2001.

6. J. P. Park, M. Do, H. E. Jin, S. W. Lee and H. Lee, *ACS Appl. Mater. Interfaces*, 2014, **6**, 18653-18660.

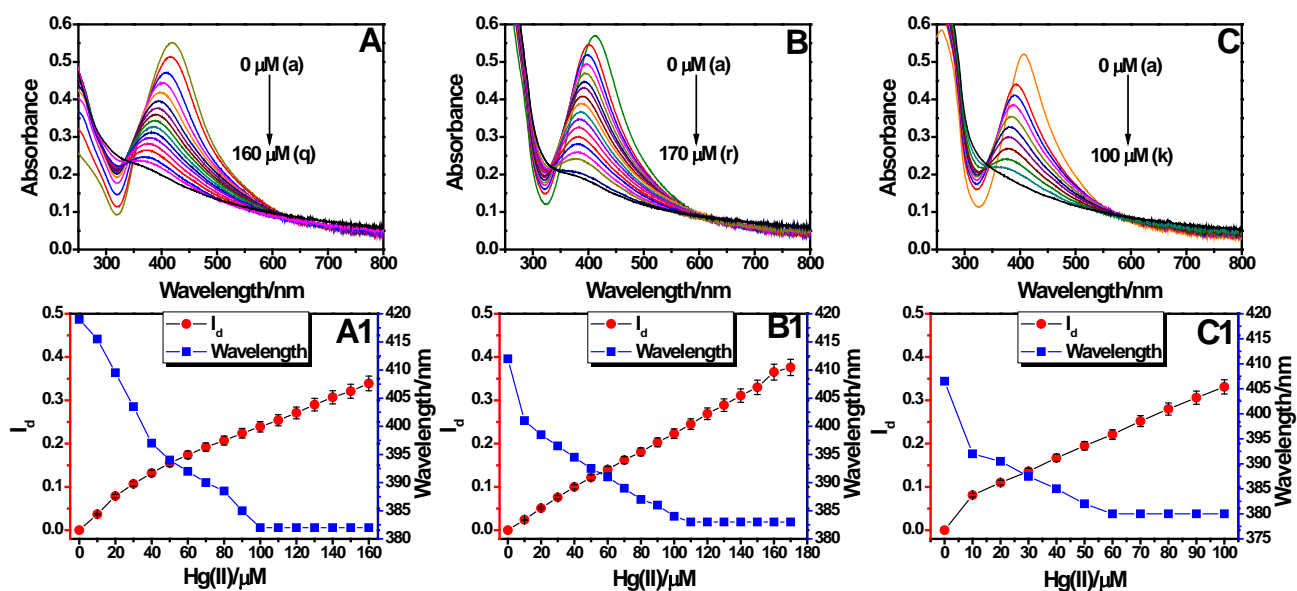

**Figure. S1** (A-C) SPR absorption spectral changes and (A1-C1) plots of changes in the absorption intensity and wavelength observed for (A and A1) SSG-Ag NPs, (B and B1) SSG-Ag<sub>wild</sub> NCBs, and (C and C1) SSG-Ag<sub>4E</sub> NCBs upon each addition of 10  $\mu\text{M}$  of Hg(II) ions.

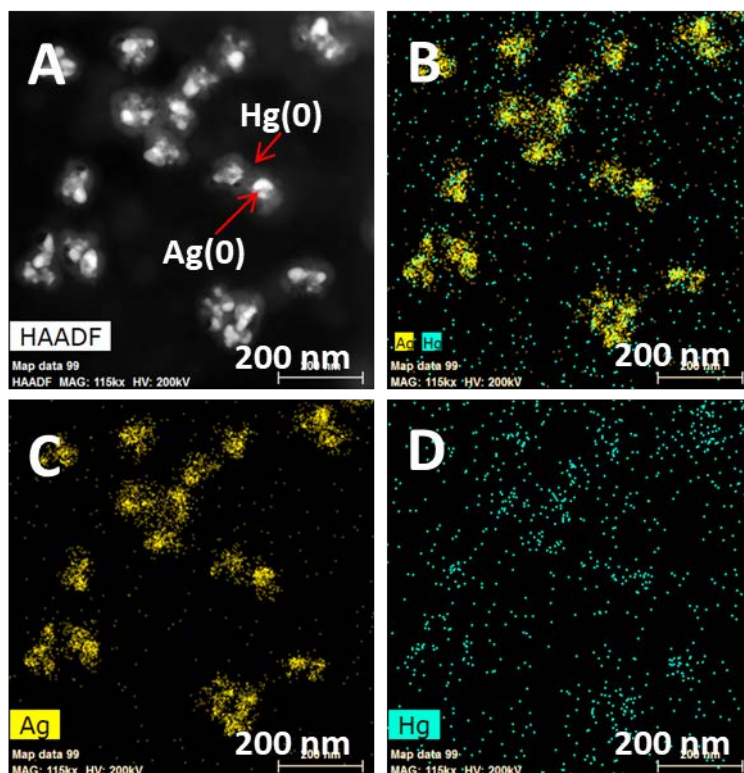

**Figure. S2** (A) STEM-HAADF images and (B-D) STEM-EDX mapping analyses of AgHg-amalgam crystals.

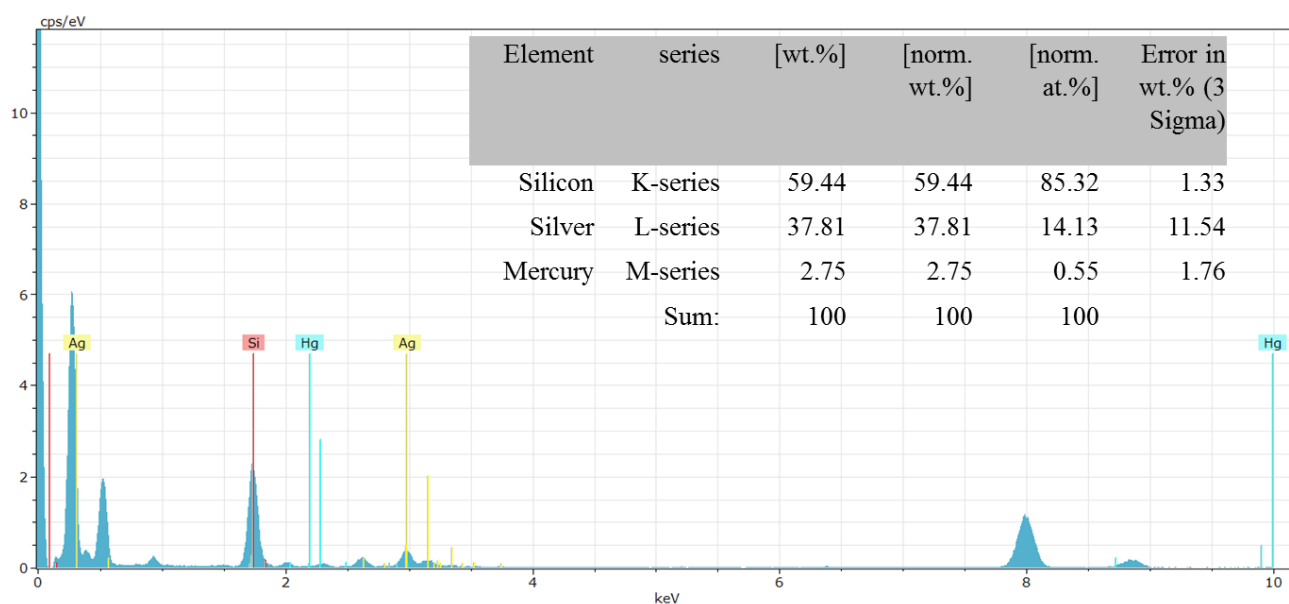

**Figure. S3** STEM-EDX point ID analysis of AgHg-amalgam crystals.

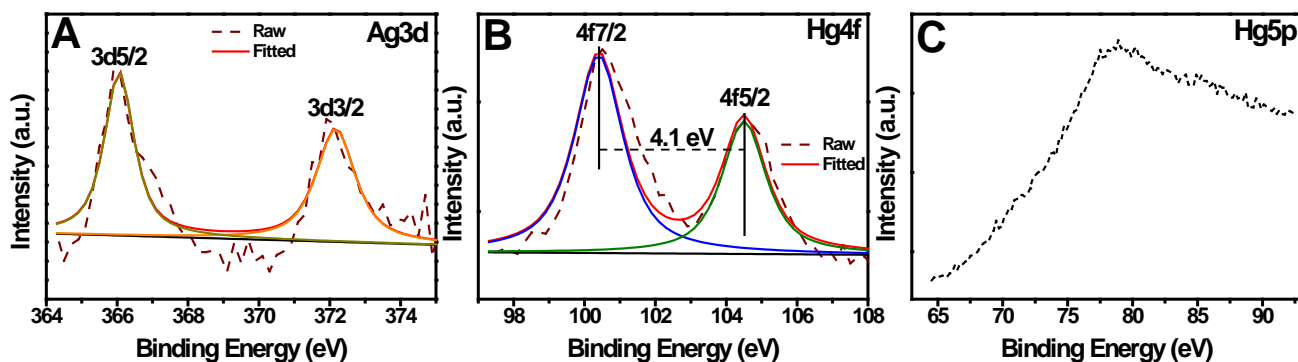

**Figure. S4** XPS spectra obtained for the AgHg-amalgam crystals and their corresponding (A) Ag3d, (B) Hg4f, and (C) Hg5p regions of core-level spectra.

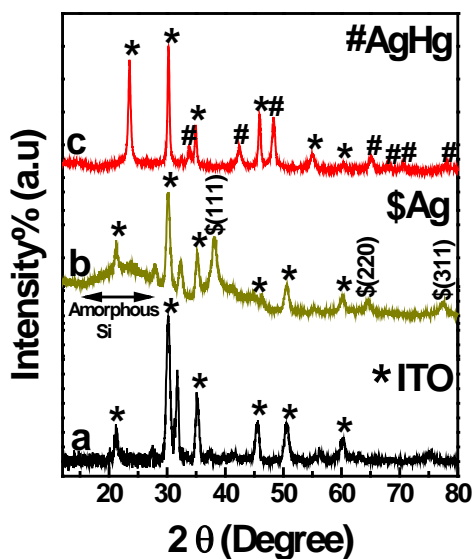

**Figure S5.** XRD analysis of (a) Bare ITO substrate, (b) SSG-Ag<sub>4E</sub> CGs, (c) AgHg-amalgam crystals.

**Table. S1** Quantification of Hg(II) ions in different water samples by using SSG–Ag<sub>4E</sub> CGs and ICP-MS.

| <b>Hg(II) Ions (<math>\mu\text{M}</math>)</b> |                                             |                                             |                         |                    |                                             |                         |                    |
|-----------------------------------------------|---------------------------------------------|---------------------------------------------|-------------------------|--------------------|---------------------------------------------|-------------------------|--------------------|
| <b>Samples</b>                                | <b>SSG–Ag<sub>4E</sub> NCBs</b>             |                                             |                         |                    | <b>ICP-MS</b>                               |                         |                    |
|                                               | <b>Added<br/>(<math>\mu\text{M}</math>)</b> | <b>Found<br/>(<math>\mu\text{M}</math>)</b> | <b>Recovery<br/>(%)</b> | <b>RSD<br/>(%)</b> | <b>Found<br/>(<math>\mu\text{M}</math>)</b> | <b>Recovery<br/>(%)</b> | <b>RSD<br/>(%)</b> |
| Tab water                                     | 0                                           | 0                                           | –                       | –                  | 0                                           | –                       | –                  |
|                                               | 25                                          | 24.93                                       | 99.73                   | 2.02               | 24.57                                       | 98.28                   | 0.74               |
|                                               | 50                                          | 50.36                                       | 100.73                  | 2.06               | 49.22                                       | 98.44                   | 0.51               |
| Pond water                                    | 0                                           | 0                                           | –                       | –                  | 0                                           | –                       | –                  |
|                                               | 25                                          | 26.34                                       | 105.36                  | 0.66               | 28.10                                       | 112.40                  | 1.76               |
|                                               | 50                                          | 52.85                                       | 105.71                  | 1.79               | 54.20                                       | 108.4                   | 0.99               |
